# Supplementary material for: Beyond Lipidation: CSF APOE4 Protein Burden, Not HDL Subclass, Drives Tau Associations in APOE4 Alzheimer’s Disease
Source: Research Square preprint supplement (doi:10.21203/rs.3.rs-9349576/v1), 2026-04-24
Supplement: Supplementary file 1 [file 12e931ba95121b8aa57a18a2.docx]

**Table 2.** APOE-ε4 carrier status moderation of HDL-biomarker associations. All regression models included covariates for age, sex, education, and clinical group.

|  | **Interaction term**  **(β, p-value, FDR-p)** | **APOE-ɛ4 non-carrier slope**  **(β, p-value)** | **APOE-ɛ4 carrier slope**  **(β, p-value)** |
| --- | --- | --- | --- |
| **CSF Small HDL x APOE-ɛ4 on Aβ1-42** | β = -0.41; p = 0.025; FDR-p = 0.038 | β = -0.04; p = 0.687 | β = -0.45; p = 0.001 |
| **CSF Small HDL x APOE-ɛ4 on tau** | β = -0.52; p = 0.015; FDR-p = 0.038 | β = 0.23; p = 0.058 | β = -0.29; p = 0.073 | |
| **CSF Small HDL x APOE-ɛ4 on p-tau181** | β = -0.40; p = 0.054; FDR-p = 0.054 | β = 0.21; p = 0.076 | β = -0.19; p = 0.229 |
| **CSF Large HDL x APOE-ɛ4 on Aβ1-42** | β = -0.28; p = 0.071; FDR-p = 0.071 | β = 0.06; p = 0.576 | β = -0.22; p = 0.075 |
| **CSF Large HDL x APOE-ɛ4 on tau** | β = -0.52; p = 0.003; FDR-p = 0.009 | β = 0.24; p = 0.049 | β = -0.28; p = 0.046 |
| **CSF Large HDL x APOE-ɛ4 on p-tau181** | β = -0.40; p = 0.024; FDR-p = 0.036 | β = 0.19; p = 0.110 | β = -0.20; p = 0.143 |
