# Supplementary material for: Beyond Lipidation: CSF APOE4 Protein Burden, Not HDL Subclass, Drives Tau Associations in APOE4 Alzheimer’s Disease
Source: Research Square preprint supplement (doi:10.21203/rs.3.rs-9349576/v1), 2026-04-24
Supplement: Supplementary file 2 [file 2a33ac90b6fb2486f6a53e44.docx]

**Table 1.**

|  | **Whole Cohort** | **Cognitively Normal, NP** | **Cognitively Normal, P** | **Mild Cognitive Impairment, NP** | **Mild Cognitive Impairment, P** | |
| --- | --- | --- | --- | --- | --- | --- |
| **N (baseline)** | 144 | 27 | 38 | 37 | 42 | |
| **Age (mean ± SD)** | 73.0± 6.6 | 73.9± 7.0 | 75.1± 5.2 | 71.2± 6.6 | 72.2 ± 7.1 | |
| **Sex (N, %)** | 82 M (56.9%) | 15 M (55.6%) | 15 M (39.5%) | 25 M (67.6%) | 27 M (64.3%) | |
| ***APOE* genotype (N, %)** |  |  |  |  |  | |
| *ɛ3/ɛ3* | 73 (50.7%) | 13 (48.1%) | 20 (52.6%) | 19 (51.4%) | 21 (50.0%) | |
| *ɛ3/ɛ4* | 45 (31.3%) | 11 (40.7%) | 13 (34.2%) | 11 (29.7%) | 10 (23.8%) | |
| *ɛ4/ɛ4* | 26 (18.1%) | 3 (11.1%) | 5 (13.2%) | 7 (18.9%) | 11 (26.2%) |
| **Race (N, %)** |  |  |  |  |  | |
| *Asian* | 2 (1.4%) | 0 (0.0%) | 0 (0.0%) | 1 (2.7%) | 1 (2.4%) | |
| *Black* | 7 (4.9%) | 2 (7.4%) | 1 (2.6%) | 2 (5.4%) | 2 (4.8%) | |
| *White* | 134 (93.1%) | 25 (92.6%) | 37 (97.4%) | 34 (91.9%) | 38 (90.5%) | |
| *Other / Unknown* | ­ 1 (0.7%) | 0 (0.0%) | 0 (0.0%) | 0 (0.0%) | 1 (2.4%) | |
| **Years of Education (mean ± SD)** | 16.3 ± 2.7 | 16.2 ± 2.9 | 16.2 ± 2.6 | 16.9 ± 2.5 | 15.8 ± 2.6 | |
| **CSF Biomarkers (mean ± SD)** |  |  |  |  |  | |
| *Aβ1-42 (pg/mL)* | 1060.9 ± 466.9 | 1231.0 ± 406.8 | 1114.5 ± 499.5 | 1025.0 ± 507.8 | 934.8 ± 405.8 | |
| *t-tau (pg/mL)* | 263.7 ± 109.4 | 248.8 ± 67.9 | 249.9 ± 92.2 | 255.5 ± 104.4 | 293.2 ± 142.5 | |
| *p-tau181 (pg/mL)* | 24.9 ± 12.0 | 22.8 ± 7.3 | 23.4 ± 9.5 | 24.1 ± 11.2 | 28.4 ± 16.0 | |
| **Small HDL (nmol/L) (mean ± SD)** | 2177.0 ± 515.8 | 2360.3 ± 518.0 | 2282.9 ± 531.2 | 2272.0 ± 496.4 | 1879.6 ± 394.4 | |
| **Large HDL (nmol/L) (mean ± SD)** | 150.2 ± 49.0 | 178.8 ± 44.9 | 154.1 ± 46.0 | 166.5 ± 46.6 | 114.0 ± 33.7 | |

**Table 1.** Demographic breakdown of participants with complete data for all covariates included at baseline. *NP=Non-Progressors, P=Progressors.
