# Supplementary material for: Beyond Lipidation: CSF APOE4 Protein Burden, Not HDL Subclass, Drives Tau Associations in APOE4 Alzheimer’s Disease
Source: Research Square preprint supplement (doi:10.21203/rs.3.rs-9349576/v1), 2026-04-24
Supplement: Supplementary file 3 [file 4206fa0e72237ad59ce03955.docx]

**Table 3.** Cross-sectional results of CSF and plasma HDL levels, APOE, and APOE-ε4 measures with clinical biomarker and cognitive outcomes. All regression models included covariates for age, sex, education, clinical group, and ε4 positivity (in models that did not include ε4 ratio or amount as an independent variable).

|  | **CSF Aβ1-42**  **(β, p-value, FDR-p)** | **CSF total tau**  **(β, p-value, FDR-p)** | **CSF p-tau181**  **(β, p-value, FDR-p)** | **RAVLT % forgetfulness**  **(β, p-value)** |
| --- | --- | --- | --- | --- |
| **CSF Total APOE** | β = 0.27; p = 0.007; FDR-p = 0.007 | β = 0.74; p < 0.001; FDR-p < 0.001 | β = 0.66; p < 0.001; FDR-p < 0.001 | β = 0.08; p = 0.436 |
| **Plasma Total APOE** | β = -0.01; p = 0.890; FDR-p = 0.890 | β = 0.03; p = 0.788; FDR-p = 0.890 | β = 0.04; p = 0.711; FDR-p = 0.890 | β = -0.17; p = 0.092 |
| **CSF APOE-ɛ4** | β = 0.09; p = 0.422; FDR-p = 0.422 | β = 0.49; p < 0.001; FDR-p < 0.001 | β = 0.48; p < 0.001; FDR-p < 0.001 | β = 0.15; p = 0.142 |
| **Plasma Total APOE-ɛ4** | β = -0.18; p = 0.124; FDR-p = 0.372 | β = -0.05; p = 0.685; FDR-p = 0.978 | β = 0.003; p = 0.978; FDR-p = 0.978 | β = -0.02; p = 0.884 |
